# Supplementary material for: Transforming doxorubicin into a cancer stem cell killer via EpCAM aptamer-mediated delivery
Source: PubMed Central journal article supplement — Theranostics. 2017 Sep 20;7(17):4071–86. doi: 10.7150/thno.20168 (PMC5694998; doi:10.7150/thno.20168), 2017-09-20
Supplement: thnov07p4071s1.pdf [file thnov07p4071s1.pdf]

# Supplementary Figure Legends

## Supple. Fig. 1

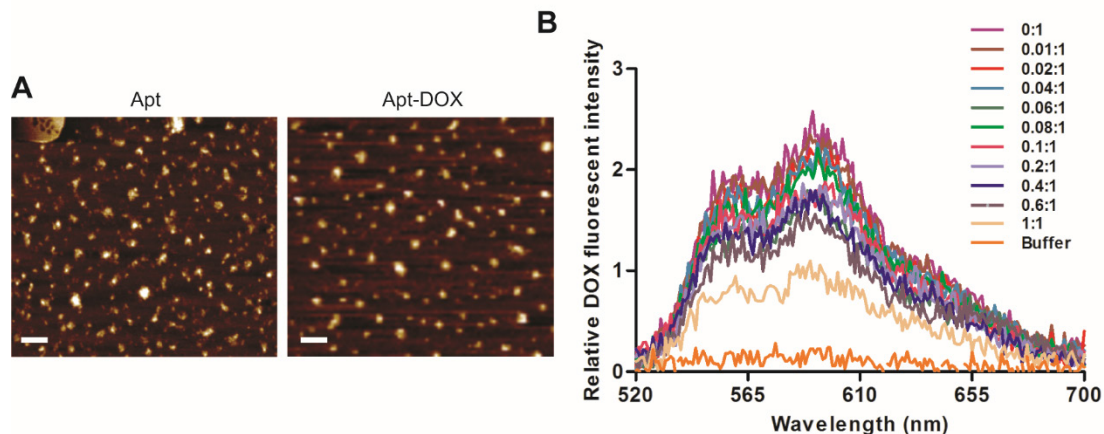

**Supplementary Figure 1. Successful intercalation of DOX to aptamers.** (A) AFM images of aptamer and the conjugation of aptamer and DOX. Scale bar is 10 nm. (B) Fluorescence quenching of DOX solution (10  $\mu$ M) with increasing molar ratios of the aptamer: DOX (from top to bottom: 0, 0.01, 0.02, 0.04, 0.06, 0.08, 0.1, 0.2, 0.4, 0.6, 1 and buffer) as determined by scanning fluorescence spectroscopy. Data shown are means  $\pm$  SEM. (n=3).

Supple. Fig. 2

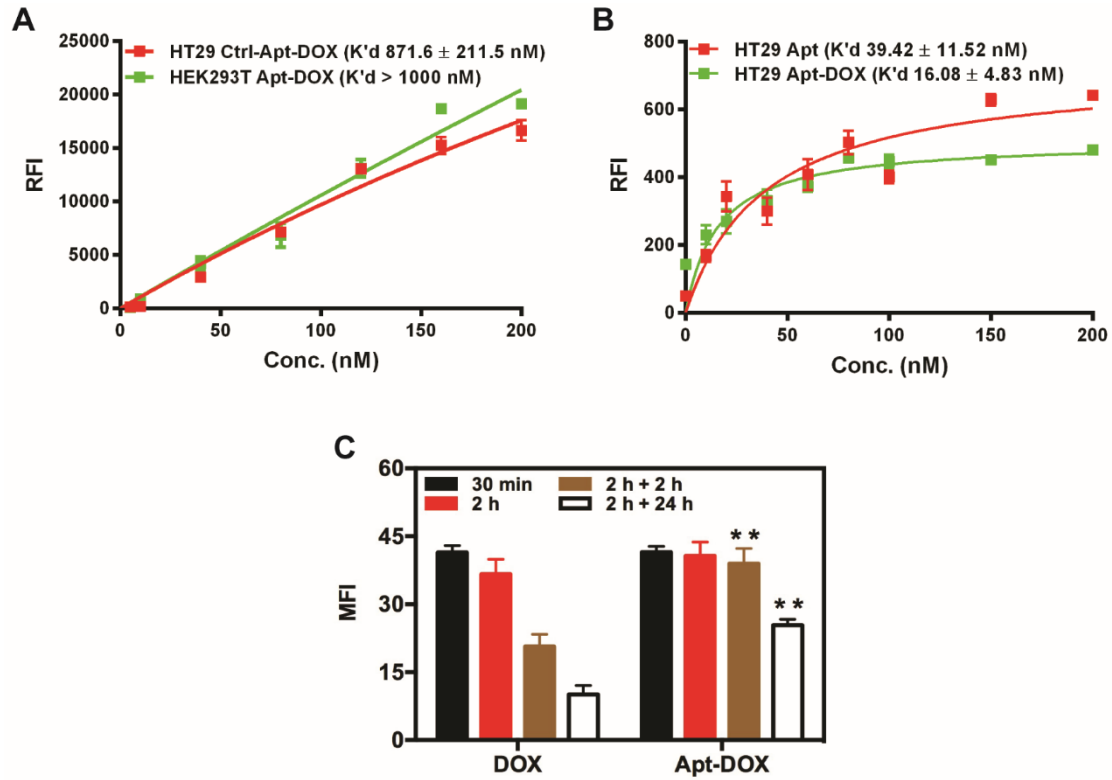

**Supple. Figure 2. Specific and enhanced delivery of DOX to target cells by EpCAM Apt-DOX conjugate.** (A-B) Uncompromised binding affinity and specificity of the EpCAM aptamer after DOX intercalation. The  $K_d$  of aptamer-DOX was evaluated using flow cytometry with fluorescently labelled Apt-DOX conjugates with concentrations ranging from 0 to 200 nM. (A) The binding of Apt-DOX or Ctrl-Apt-DOX to EpCAM-negative cell line HEK293T and HT29 cells, respectively. (B) The binding of the free aptamer and Apt-DOX to HT29 cells. (C) Quantitative analysis of aptamer-guided delivery of DOX to the nuclei of HT29 cells after incubating cells with Apt-DOX conjugates (1.5  $\mu$ M of DOX equivalent) at 37  $^{\circ}$ C. Scale bar is 5  $\mu$ m. Data shown are means  $\pm$  SEM. (n=3). \*\* $P < 0.01$  compared with free DOX administration groups (two-tailed Student's  $t$ -test).

Supple. Fig. 3

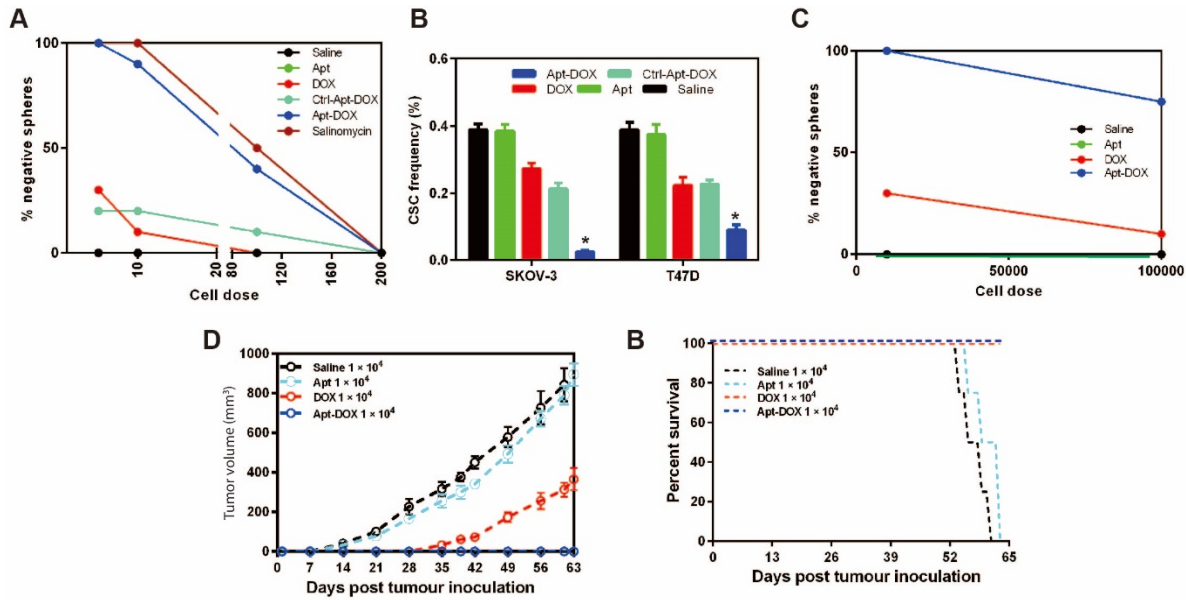

**Supple. Figure 3.** Quantification of the elimination of CSCs *in vitro* and *ex vivo*. **(A)** Limiting dilution assay of HT29 cells after *in vitro* treatment. **(B)** The percent of CSC frequency of SKOV-3 and T47D breast cancer cells based on *in vitro* limiting dilution assay. **(C)** Limiting dilution assay of HT29 cells after *ex vivo* treatment. Data shown are means  $\pm$  SEM. (n=3, unless indicated otherwise). **(D)** Tumour growth of colorectal tumours in mice inoculated with  $1 \times 10^4$  cells/mouse following treatment with various agents as indicated. **(E)** Survival curves of NOD/SCID mice-bearing xenograft tumours treated as described. Data shown are means  $\pm$  SEM. (n=3, unless indicated otherwise).

**Supple. Fig. 4**

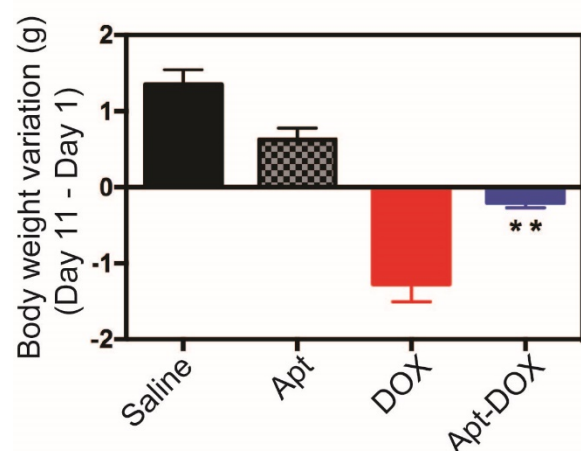

**Supple. Fig. 4 Aptamer-guided DOX delivery reduced gross adverse effects.** Body weight variation of tumour-bearing mice between day 1 and day 11 after treatment as indicated were recorded. Mice were treated with 1.5  $\mu$ M of Apt-DOX/mouse or an equivalent dose of free DOX. Data shown are means  $\pm$  SEM. (n=3, unless indicated otherwise). \*\*  $P < 0.01$  compared with mice receiving free DOX.

**Supple. Fig. 5**

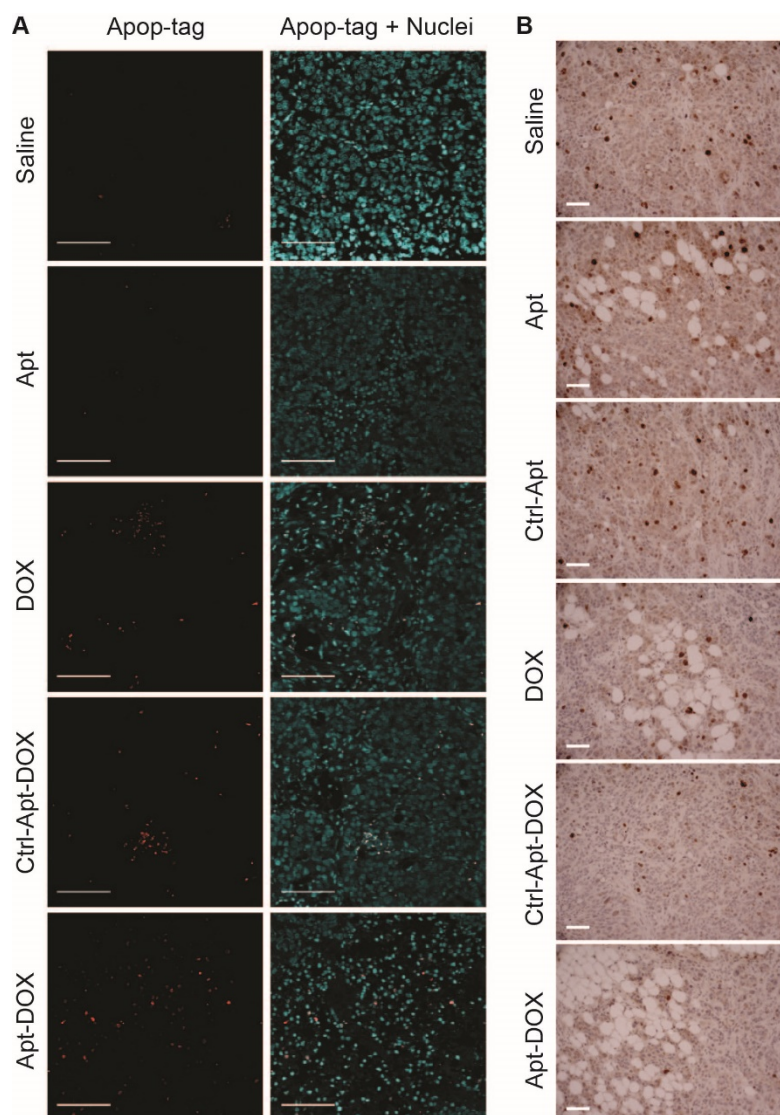

**Supple. Figure 5. Apt-DOX treatment enhanced apoptosis and inhibited proliferation of HT29 xenograft tumour.** NOD/SCID mice bearing HT29 xenograft tumours with a volume of 50 mm<sup>3</sup> were treated as indicated. **(A)** Representative of confocal micrographs of TUNEL assay of cells with illustrated treatments. **(B)** Representative images of Ki67 assay on HT29 xenograft tumour sections with illustrated treatments. Scale bar is 100  $\mu\text{m}$ .

## Supple. Fig. 6

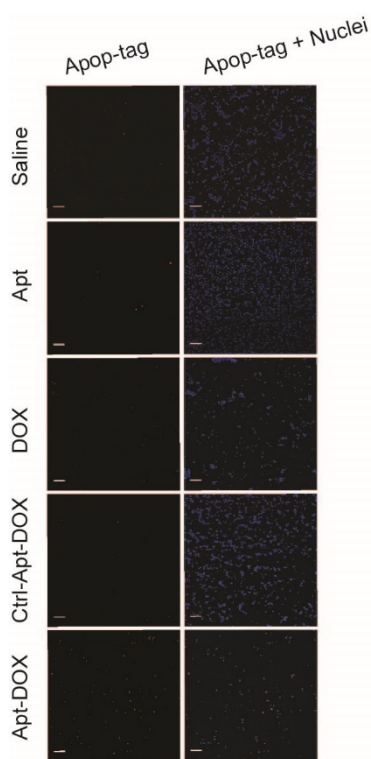

**Supple. Fig. 6** Representative of confocal micrographs of TUNEL assay of cells with illustrated treatments. Scale bar is 100  $\mu\text{m}$ .

## Supple. Tables

**Supple. Table 1. *In vitro* limiting dilution assay of HT29 colorectal tumour cells.**

| Groups       | Cell seeded/well | numbers | Tumour incidence <sup>†</sup> | sphere | CSC frequency (95% CI) |
|--------------|------------------|---------|-------------------------------|--------|------------------------|
| Saline       | 200              |         | 10/10                         |        |                        |
|              | 100              |         | 10/10                         |        | 1 in 2.53              |
|              | 10               |         | 10/10                         |        | (4.40-1.46)            |
|              | 5                |         | 10/10                         |        |                        |
|              | 1                |         | 0/10                          |        |                        |
| Apt          | 200              |         | 10/10                         |        |                        |
|              | 100              |         | 10/10                         |        | 1 in 2.53              |
|              | 10               |         | 10/10                         |        | (4.40-1.46)            |
|              | 5                |         | 10/10                         |        |                        |
|              | 1                |         | 0/10                          |        |                        |
| DOX          | 200              |         | 10/10                         |        |                        |
|              | 100              |         | 10/10                         |        | 1 in 5.04              |
|              | 10               |         | 9/10                          |        | (8.53-2.98)            |
|              | 5                |         | 7/10                          |        |                        |
|              | 1                |         | 0/10                          |        |                        |
| Ctrl-Apt-DOX | 200              |         | 10/10                         |        |                        |
|              | 100              |         | 9/10                          |        | 1 in 12.06             |
|              | 10               |         | 8/10                          |        | (22.67-6.41)           |
|              | 5                |         | 8/10                          |        |                        |
|              | 1                |         | 0/10                          |        |                        |
| Apt-DOX      | 200              |         | 10/10                         |        |                        |
|              | 100              |         | 6/10                          |        | 1 in 84.39             |
|              | 10               |         | 1/10                          |        | (143.07-49.78)         |
|              | 5                |         | 0/10                          |        |                        |
|              | 1                |         | 0/10                          |        |                        |
| Salinomycin  | 200              |         | 10/10                         |        |                        |
|              | 100              |         | 5/10                          |        | 1 in 104.68            |
|              | 10               |         | 0/10                          |        | (178.39-61.43)         |
|              | 5                |         | 0/10                          |        |                        |
|              | 1                |         | 0/10                          |        |                        |

**Supple. Table 2. CSC frequency of ovarian and breast tumour cells treated by DOX and Apt-DOX and other controls *in vitro* with limiting dilution assay.**

|                        | Groups | Saline                   | Apt                      | DOX                      | Ctrl-Apt-DOX             | Apt-DOX                      |
|------------------------|--------|--------------------------|--------------------------|--------------------------|--------------------------|------------------------------|
| CSC frequency (95% CI) | SKOV-3 | 1 in 2.53<br>(5.53-1.16) | 1 in 2.53<br>(5.53-1.16) | 1 in 3.61<br>(7.58-1.72) | 1 in 4.75<br>(9.98-2.26) | 1 in 57.54<br>(124.50-26.60) |
|                        | T47D   | 1 in 2.52<br>(5.48-1.16) | 1 in 2.52<br>(5.48-1.16) | 1 in 4.55<br>(9.01-2.30) | 1 in 4.55<br>(9.01-2.30) | 1 in 11.87<br>(23.72-5.94)   |
|                        |        |                          |                          |                          |                          |                              |
|                        |        |                          |                          |                          |                          |                              |

**Supple. Table 3. *Ex vivo* limiting dilution assay of single suspension cells after *in vitro* treatment.**

| Groups  | Cell numbers injected | Tumour incidence <sup>†</sup> | Latency (days) <sup>‡</sup> | CSC frequency (95% CI) |
|---------|-----------------------|-------------------------------|-----------------------------|------------------------|
| Saline  | 1 x 10 <sup>5</sup>   | 4/4                           | 8                           | 1 in 1                 |
|         | 1 x 10 <sup>4</sup>   | 4/4                           | 16 – 18                     | (15582-1)              |
| Apt     | 1 x 10 <sup>5</sup>   | 4/4                           | 10                          | 1 in 1                 |
|         | 1 x 10 <sup>4</sup>   | 4/4                           | 18 – 19                     | (15582-1)              |
| DOX     | 1 x 10 <sup>5</sup>   | 4/4                           | 13                          | 1 in 1                 |
|         | 1 x 10 <sup>4</sup>   | 4/4                           | 31 – 32                     | (15582-1)              |
| Apt-DOX | 1 x 10 <sup>5</sup>   | 1/4                           | 40                          | 1 in 387857            |
|         | 1 x 10 <sup>4</sup>   | 0/4                           | --                          | (2737697-54949)        |

<sup>†</sup>The number of tumours detected/number of mice received xenotransplantation.

<sup>‡</sup>Approximate number of days from tumour cell injection to the appearance of a tumour.

**Supple. Table 4. Pharmacokinetic parameters of free DOX, PEGylated Apt-DOX and control PEGylated Apt-DOX after *i.v.* administration at a dose of equivalent to 5 mg/kg DOX.**

| Pharmacokinetic parameter                              | Free DOX              | Ctrl-Apt-DOX               | Apt-DOX                    |
|--------------------------------------------------------|-----------------------|----------------------------|----------------------------|
| $C_{\max}$ ( $\mu\text{g/mL}$ )                        | $2.53 \pm 0.78$       | $23.02 \pm 3.16$           | $25.67 \pm 4.58$           |
| $t_{1/2\alpha}$ (h)                                    | $0.07 \pm 0.02$       | $0.71 \pm 0.15^*$          | $0.87 \pm 0.11^*$          |
| $t_{1/2\beta}$ (h)                                     | $0.87 \pm 0.25$       | $7.13 \pm 3.16^*$          | $7.73 \pm 2.35^*$          |
| MRT (h)                                                | $2.48 \pm 1.39$       | $15.49 \pm 2.55^*$         | $16.25 \pm 2.42^*$         |
| AUC ( $\text{h} \cdot \text{h} \cdot \mu\text{g/mL}$ ) | $428.358 \pm 156.32$  | $2836.54 \pm 1032.41^{**}$ | $3118.64 \pm 1537.72^{**}$ |
| CL ( $\text{mL/h/kg}$ )                                | $331.33 \pm 87.54$    | $37.07 \pm 3.65^*$         | $30.36 \pm 3.44^*$         |
| Vss ( $\text{mL/kg}$ )                                 | $9404.75 \pm 1578.32$ | $470.31 \pm 112.38^{**}$   | $372.92 \pm 98.65^{**}$    |

$C_{\max}$ , maximum plasma concentration;  $t_{1/2\beta}$ , elimination half-life; MRT, mean retention time; AUC, area under the plasma concentration-time curves; CL, total body clearance; Vss, steady state volume of distribution. \*,  $P < 0.01$ ; \*\*,  $P < 0.001$  compared with rats received free DOX (two-tailed Student's t-test).

**Supple. Table 5. *In vitro* limiting dilution assay of colorectal tumour cells prepared from xenograft tumours after *in vivo* treatment.**

| Groups       | Cell seeded/well | numbers | Tumour incidence <sup>†</sup> | sphere | CSC frequency (95% CI) |
|--------------|------------------|---------|-------------------------------|--------|------------------------|
| Saline       | 200              |         | 10/10                         |        |                        |
|              | 100              |         | 10/10                         |        | 1 in 2.53              |
|              | 10               |         | 10/10                         |        | (4.40-1.46)            |
|              | 5                |         | 10/10                         |        |                        |
|              | 1                |         | 0/10                          |        |                        |
| Ctrl-Apt     | 200              |         | 10/10                         |        |                        |
|              | 100              |         | 10/10                         |        | 1 in 2.53              |
|              | 10               |         | 10/10                         |        | (4.40-1.46)            |
|              | 5                |         | 10/10                         |        |                        |
|              | 1                |         | 0/10                          |        |                        |
| Apt          | 200              |         | 10/10                         |        |                        |
|              | 100              |         | 10/10                         |        | 1 in 2.53              |
|              | 10               |         | 10/10                         |        | (4.40-1.46)            |
|              | 5                |         | 10/10                         |        |                        |
|              | 1                |         | 0/10                          |        |                        |
| DOX          | 200              |         | 10/10                         |        |                        |
|              | 100              |         | 8/10                          |        | 1 in 28.98             |
|              | 10               |         | 6/10                          |        | (55.30-15.18)          |
|              | 5                |         | 4/10                          |        |                        |
|              | 1                |         | 0/10                          |        |                        |
| Ctrl-Apt-DOX | 200              |         | 10/10                         |        |                        |
|              | 100              |         | 8/10                          |        | 1 in 29.18             |
|              | 10               |         | 5/10                          |        | (55.60-15.30)          |
|              | 5                |         | 5/10                          |        |                        |
|              | 1                |         | 0/10                          |        |                        |
| Apt-DOX      | 200              |         | 5/10                          |        |                        |
|              | 100              |         | 0/10                          |        | 1 in 525.67            |
|              | 10               |         | 0/10                          |        | (1246.2-221.74)        |
|              | 5                |         | 0/10                          |        |                        |
|              | 1                |         | 0/10                          |        |                        |

<sup>†</sup>The number of tumour sphere detected/number of cell seeded.

**Supple. Table 6. Aptamer-guided DOX delivery increased tumour latency and reduced CSC frequency in HT29 xenograft tumours.**

| Groups       | Cell numbers injected | Tumour incidence <sup>†</sup> | Latency (days) <sup>‡</sup> | CSC frequency (95% CI)        |
|--------------|-----------------------|-------------------------------|-----------------------------|-------------------------------|
| Saline       | 1 x 10 <sup>5</sup>   | 4/4                           | 7 – 9                       | 1 in 417<br>(1259-138)        |
|              | 1 x 10 <sup>4</sup>   | 4/4                           | 18 – 23                     |                               |
|              | 1 x 10 <sup>3</sup>   | 4/4                           | 36 – 42                     |                               |
|              | 1 x 10 <sup>2</sup>   | 0/4                           | –                           |                               |
| Ctrl-Apt     | 1 x 10 <sup>5</sup>   | 4/4                           | 7 - 10                      | 1 in 417<br>(1259-138)        |
|              | 1 x 10 <sup>4</sup>   | 4/4                           | 20 – 25                     |                               |
|              | 1 x 10 <sup>3</sup>   | 4/4                           | 38 – 45                     |                               |
|              | 1 x 10 <sup>2</sup>   | 0/4                           | –                           |                               |
| Apt          | 1 x 10 <sup>5</sup>   | 4/4                           | 8 – 10                      | 1 in 417<br>(1259-138)        |
|              | 1 x 10 <sup>4</sup>   | 4/4                           | 21 – 24                     |                               |
|              | 1 x 10 <sup>3</sup>   | 4/4                           | 37 – 48                     |                               |
|              | 1 x 10 <sup>2</sup>   | 0/4                           | –                           |                               |
| DOX          | 1 x 10 <sup>5</sup>   | 4/4                           | 13 – 16                     | 1 in 3609<br>(10942-1190)     |
|              | 1 x 10 <sup>4</sup>   | 3/4                           | 27 – 34                     |                               |
|              | 1 x 10 <sup>3</sup>   | 3/4                           | 50 –                        |                               |
|              | 1 x 10 <sup>2</sup>   | 0/4                           | –                           |                               |
| Ctrl-Apt-DOX | 1 x 10 <sup>5</sup>   | 4/4                           | 12 – 17                     | 1 in 4677<br>(13769-1589)     |
|              | 1 x 10 <sup>4</sup>   | 3/4                           | 26 – 30                     |                               |
|              | 1 x 10 <sup>3</sup>   | 2/4                           | 50 –                        |                               |
|              | 1 x 10 <sup>2</sup>   | 0/4                           | –                           |                               |
| Apt-DOX      | 1 x 10 <sup>5</sup>   | 2/4                           | 30 – 35                     | 1 in 108037<br>(360667-32362) |
|              | 1 x 10 <sup>4</sup>   | 1/4                           | 47 –                        |                               |
|              | 1 x 10 <sup>3</sup>   | 0/4                           | –                           |                               |
|              | 1 x 10 <sup>2</sup>   | 0/4                           | –                           |                               |

<sup>†</sup>The number of tumours detected/number of cell injected.

<sup>‡</sup>Approximate number of days from tumour cell injection to the appearance of a tumour.
